# Supplementary material for: Layer-separated MoS2bearing reduced graphene oxide formed by an in situ intercalation-cum-anchoring route mediated by Co(OH)2as a Pt-free electrocatalyst for oxygen reduction
Source: Royal Society of Chemistry journal article supplement (doi:10.1039/c5nr04415d), 2015-01-01
Supplement: c5nr04415d1.pdf [file c5nr04415d1.pdf]

## Electronic Supplementary Information

**Layer-separated MoS<sub>2</sub> bearing reduced graphene oxide formed by an *in-situ* intercalation-cum-anchoring route mediated by Co(OH)<sub>2</sub> as a Pt-free electrocatalyst for oxygen reduction**

Rajith Illathvalappil <sup>a</sup>, Sreekuttan M. Unni <sup>a,b</sup>, and Sreekumar Kurungot <sup>a,b</sup> \*.

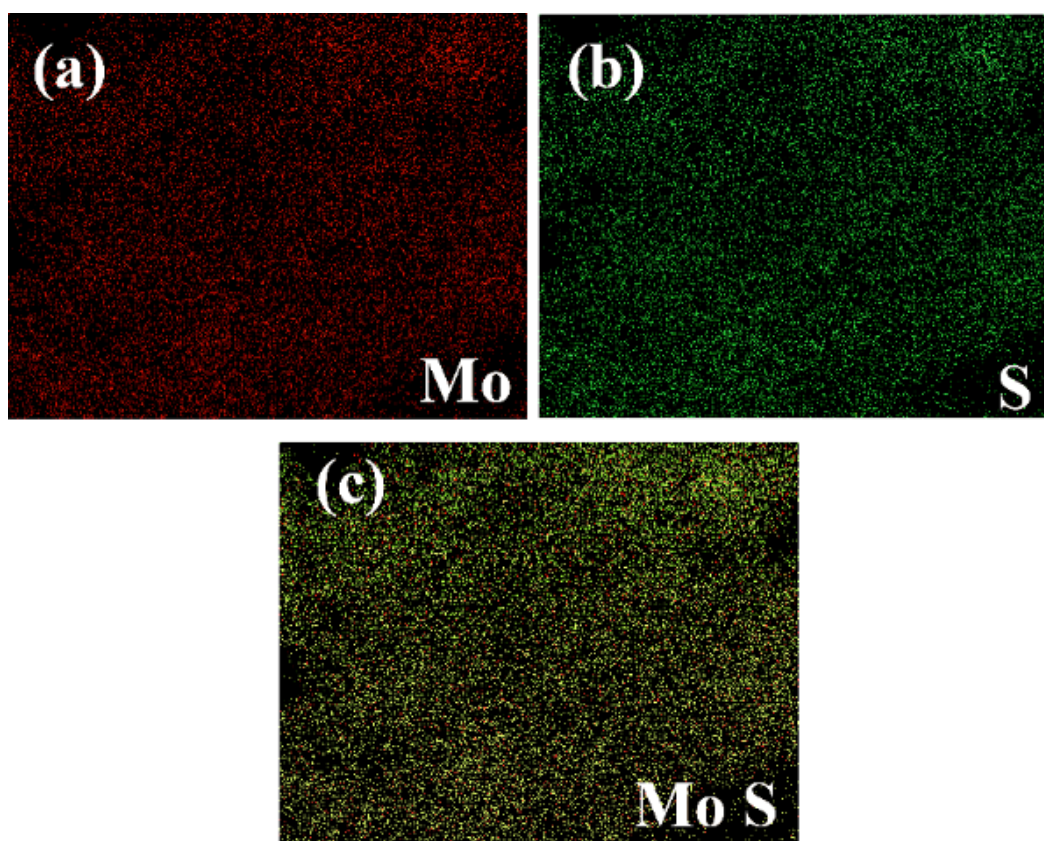

**Fig. S1.** SEM elemental mapping of MoS<sub>2</sub>-P (a) molybdenum, (b) sulphur and (c) molybdenum and sulphur combined.

The SEM elemental mapping of molybdenum (Figure S1a) and sulphur (Figure S1b) clearly reveals the presence of Mo and S in MoS<sub>2</sub>-P, which shows a nearly homogeneous distribution.

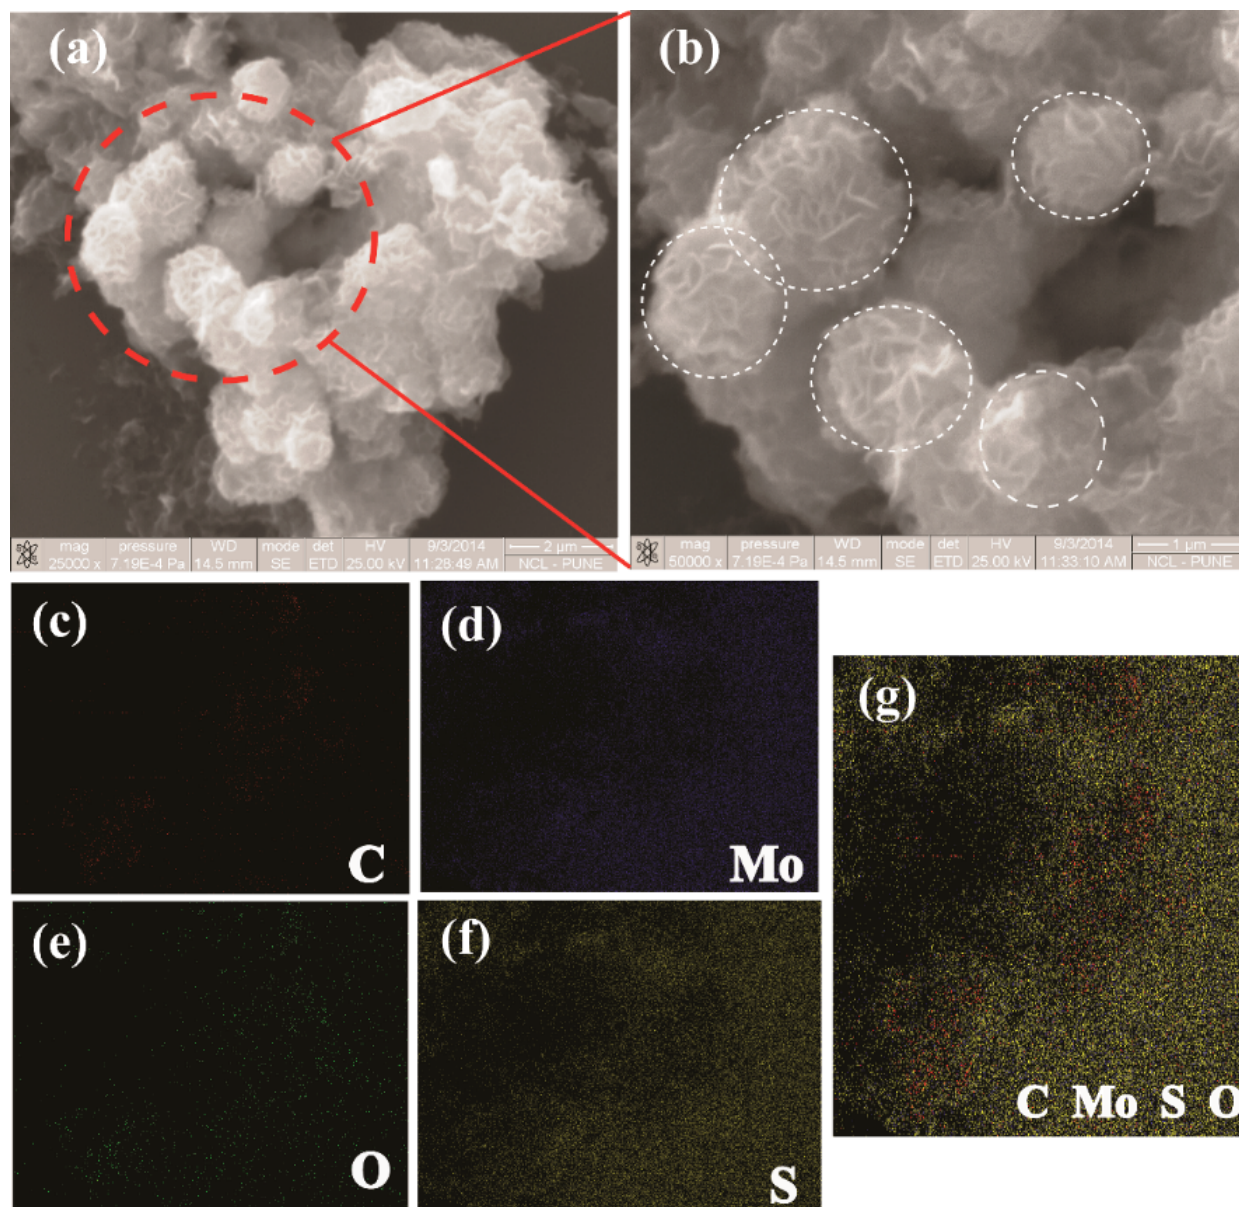

**Fig. S2.** SEM images of MoS<sub>2</sub>/rGO and the corresponding elemental mapping.

SEM images of MoS<sub>2</sub>/rGO (Figure S2a and S2b) show a flower like shape with more exposed edge surface compared to the as synthesized MoS<sub>2</sub> (*i.e.* MoS<sub>2</sub>-P). The white dotted circles (Figure S2b) indicate the flower like growth pattern of MoS<sub>2</sub>/rGO. The Mo (Figure S2d) and S (Figure S2f) mappings depict that the MoS<sub>2</sub> phase is well dispersed on the rGO surface. Apart from the C, Mo and S moieties,

MoS<sub>2</sub>/rGO also shows presence of oxygen (Figure S2e), which could be arising from the functional groups from rGO and also from the oxides of molybdenum.

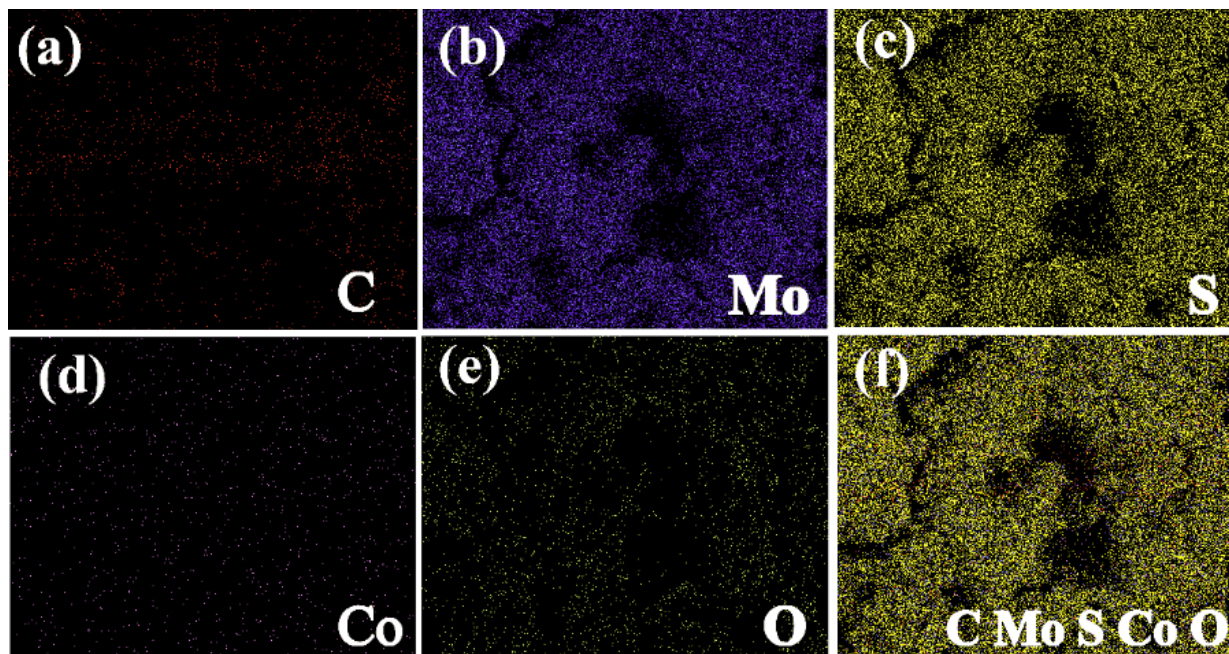

Fig. S3. SEM elemental mapping of Co(OH)<sub>2</sub>-MoS<sub>2</sub>/rGO.

As the intensity of the carbon is found to be lower compared to the molybdenum and sulphur in the SEM elemental mapping, it can be concluded that both molybdenum and sulphur are covered very well above the carbon support. Cobalt (Figure S3d) and oxygen (Figure S3e) mappings indicate that Co(OH)<sub>2</sub> is decorated on the surface of MoS<sub>2</sub>, and the lower intensity of the cobalt indicates that the amount of cobalt is relatively less in the sample.

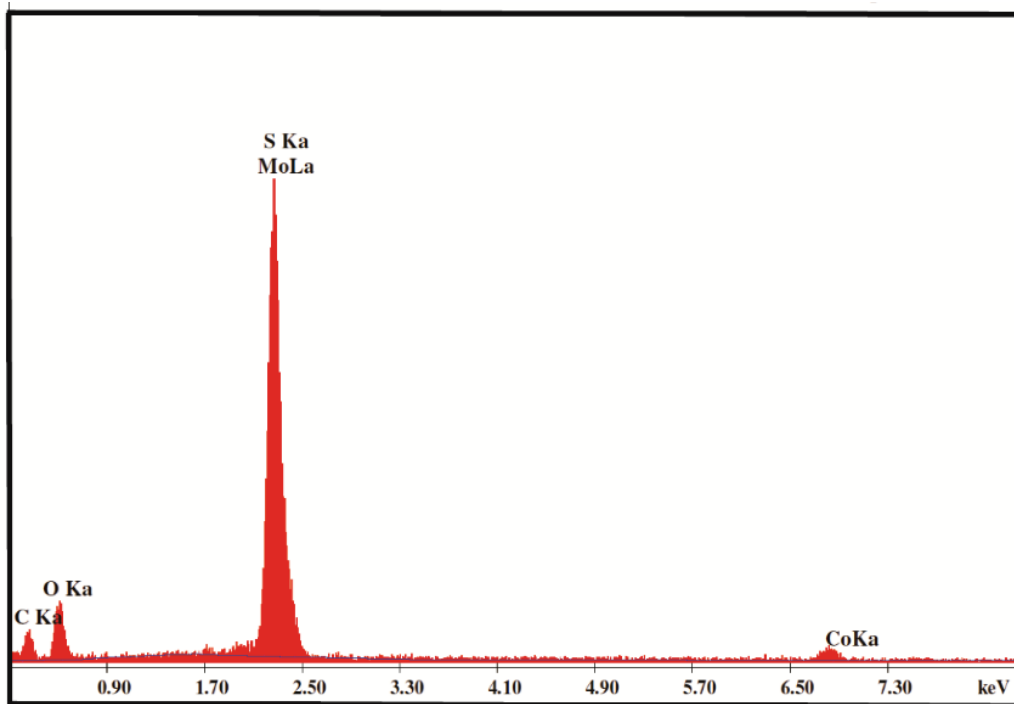

Fig. S4. EDAX spectrum of  $\text{Co(OH)}_2\text{-MoS}_2/\text{rGO}$ .

EDAX is providing the confirmation on cobalt in the sample. The amount of cobalt is comparatively less than that of Mo and S. Also, the peak for carbon also is found to be less in this case, which is attributed to the coverage of  $\text{MoS}_2$  sheets on rGO.

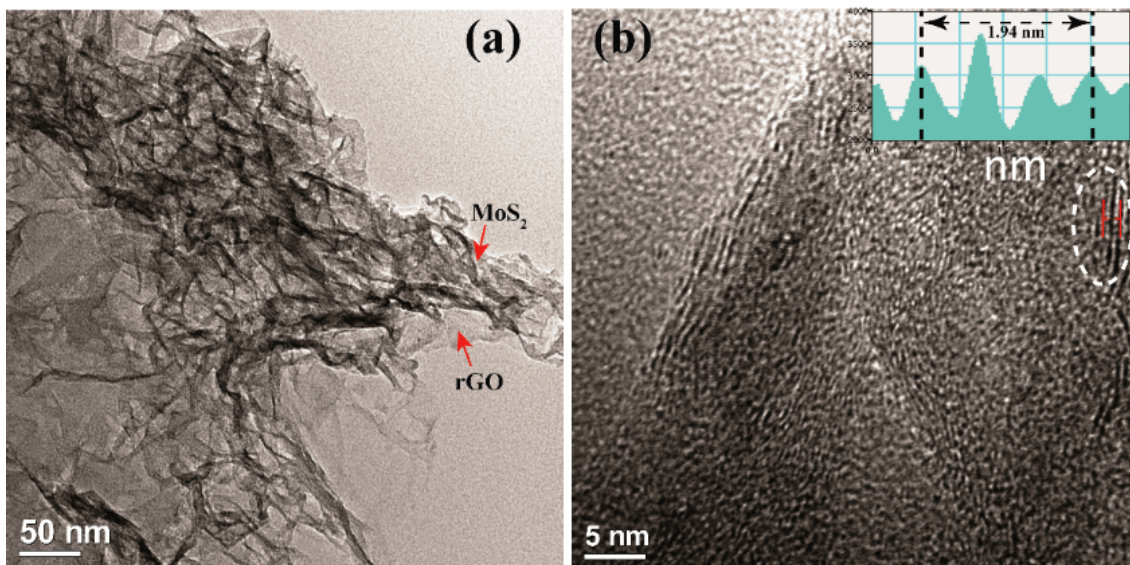

Fig. S5. TEM image of a)  $\text{MoS}_2/\text{rGO}$  and b) magnified image of  $\text{MoS}_2/\text{rGO}$

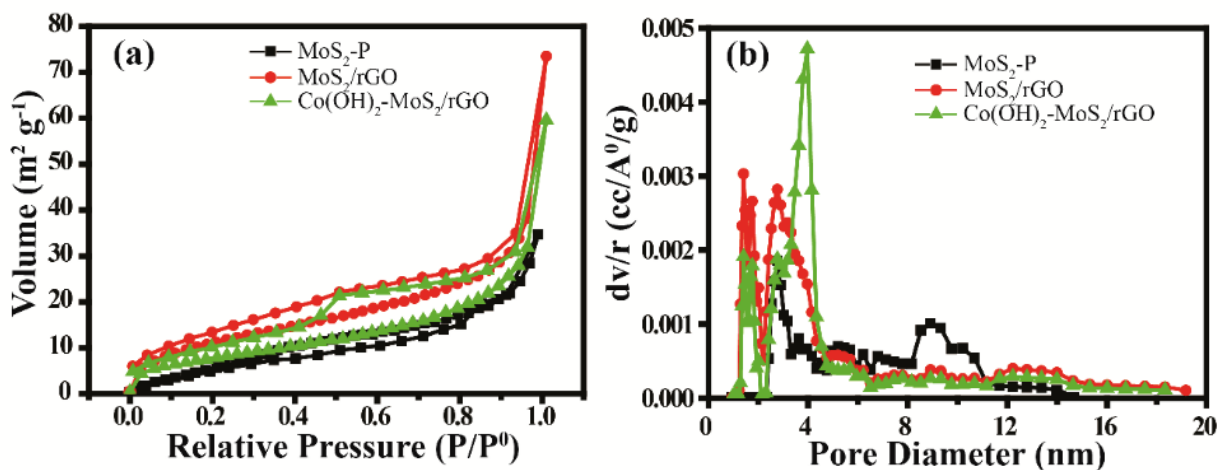

Fig. S6. (a)  $N_2$  adsorption-desorption isotherm profiles of  $MoS_2-P$ ,  $MoS_2/rGO$  and  $Co(OH)_2-MoS_2/rGO$  and (b) pore size distribution profiles of  $MoS_2-P$ ,  $MoS_2/rGO$  and  $Co(OH)_2-MoS_2/rGO$ .

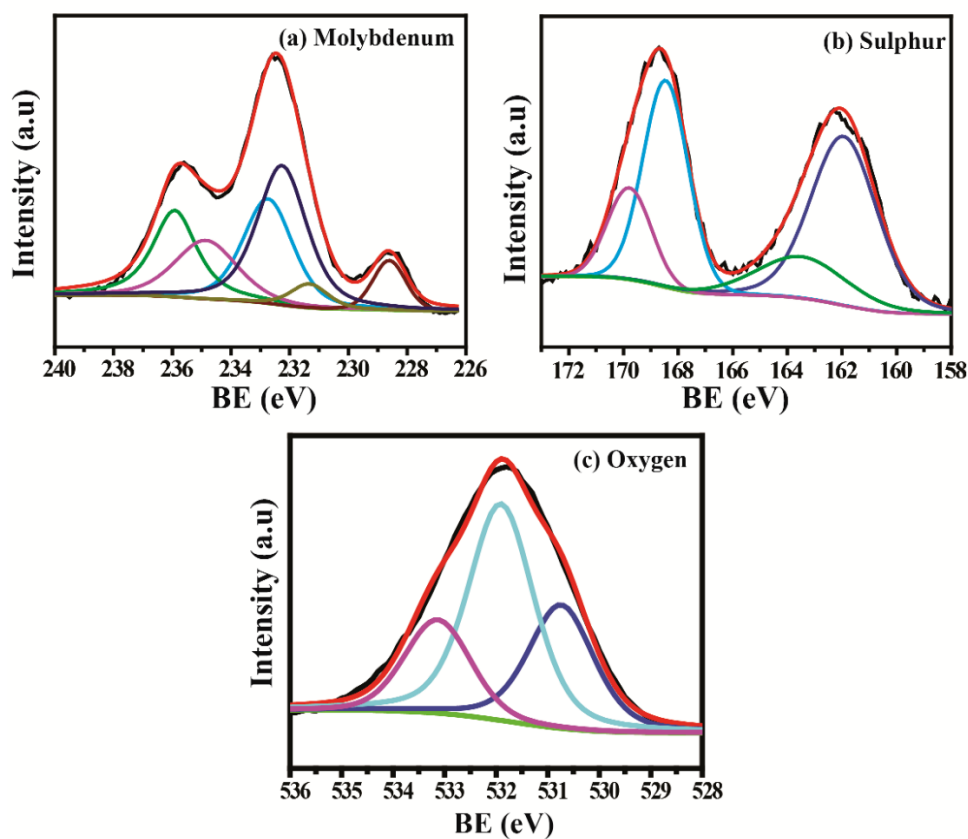

Fig. S7. Deconvoluted XPS of  $MoS_2-P$  (a) molybdenum, (b) sulphur and (c) oxygen. The black line corresponds to the raw data and the red line represents the fitted data.

The XPS of MoS<sub>2</sub>-P depicts the peak for molybdenum, sulphur and oxygen. The deconvoluted XPS of molybdenum (Figure S7a) shows the peaks at 228.6 and 231.3 eV corresponding to the 3d<sub>3/2</sub> and 3d<sub>1/2</sub> peak for Mo (IV) cation. The peaks at 232.7 and 235.9 eV show higher oxidation state of molybdenum and this suggests the presence of oxides of molybdenum also in the sample. The deconvoluted sulphur spectra (Figure S7b) show peaks at 161.8 and 163.3 eV for the 2p<sub>3/2</sub> and 2p<sub>1/2</sub> for the sulphide.<sup>1</sup> This confirms the presence of MoS<sub>2</sub> in the sample. The peak at 530.7 eV corresponding to the O 1s peak for MoO<sub>3</sub>.<sup>2</sup> The peak at 532 eV depicts the peak for physically adsorbed oxygen molecules.<sup>3</sup>

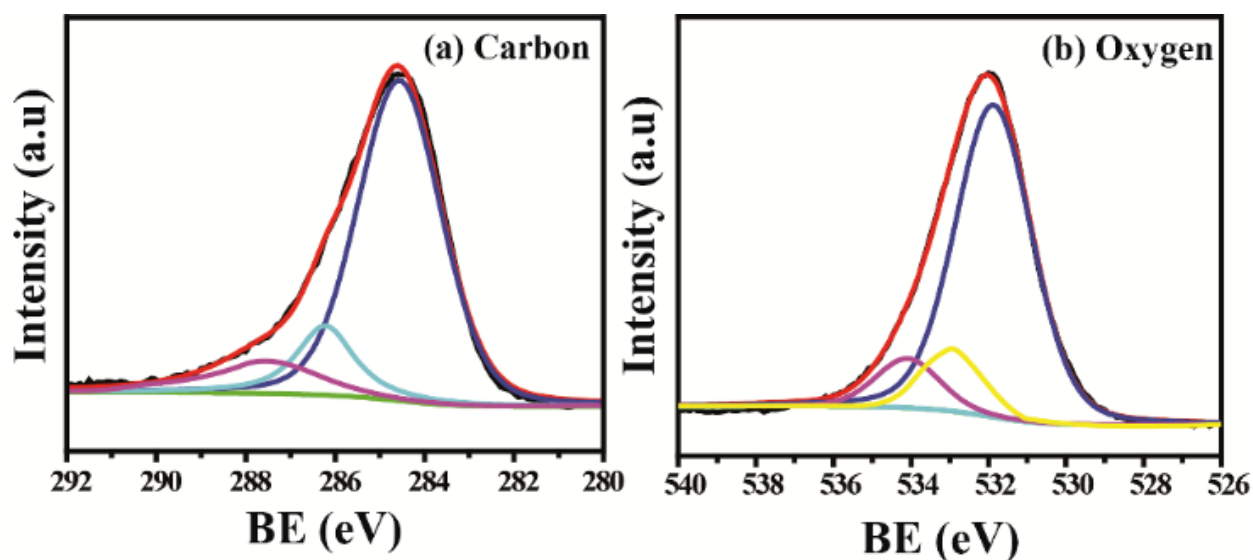

Fig. S8. Deconvoluted XPS of (a) carbon and (b) oxygen in Co(OH)<sub>2</sub>-MoS<sub>2</sub>/rGO. The black curve corresponds to the raw data and the red curve represents the fitted data.

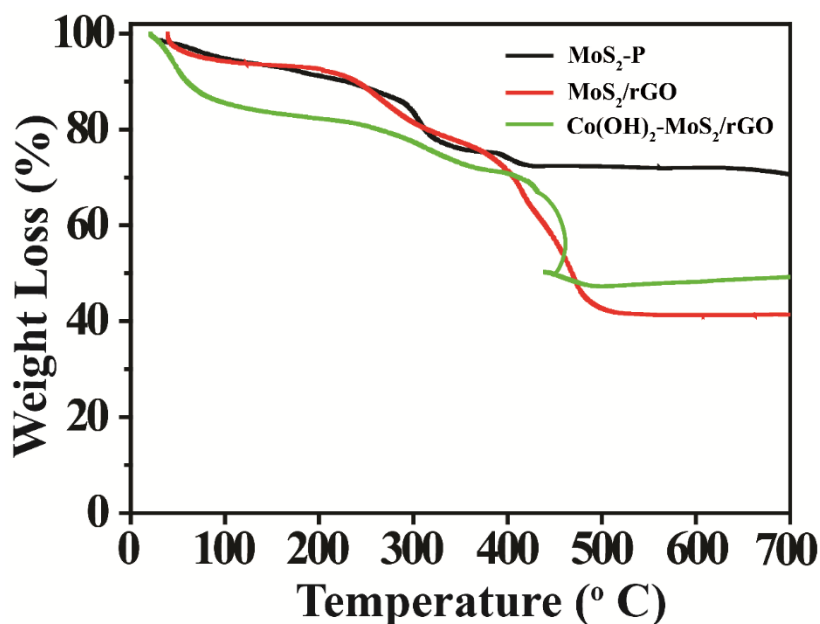

**Figure S9:** TGA analysis of MoS<sub>2</sub>-P, MoS<sub>2</sub>/rGO and Co(OH)<sub>2</sub>-MoS<sub>2</sub>/rGO.

Thermo gravimetric analysis (TGA) of MoS<sub>2</sub>-P, MoS<sub>2</sub>/rGO and Co(OH)<sub>2</sub>-MoS<sub>2</sub>/rGO was carried out in air atmosphere from room temperature to 700 °C with a heating rate of 10°/min to find out the weight percentage of Co(OH)<sub>2</sub>, MoS<sub>2</sub> and rGO in the Co(OH)<sub>2</sub>MoS<sub>2</sub>/rGO composite. The initial weight loss from room temperature to 200 °C was mainly attributed to the removal of the physisorbed/chemisorbed water molecules. Above 300 °C, a sudden drop in the weight was observed for the MoS<sub>2</sub>-P, MoS<sub>2</sub>/rGO and Co(OH)<sub>2</sub>-MoS<sub>2</sub>/rGO samples. This is attributed to the transformation of MoS<sub>2</sub> into MoO<sub>3</sub>. Above 400 °C, carbon would be converted into CO<sub>2</sub> and this can lead to a sudden weight loss for the MoS<sub>2</sub>/rGO and Co(OH)<sub>2</sub>-MoS<sub>2</sub>/rGO samples. The Co(OH)<sub>2</sub> decomposition is expected to start in the range of 170-330 °C with the loss of OH group.<sup>4</sup> The weight percentages of rGO, MoS<sub>2</sub> and Co(OH)<sub>2</sub> in Co(OH)<sub>2</sub>-MoS<sub>2</sub>/rGO are approximately 50 wt%, 40 wt% and 10 wt% respectively.

### Calibration of the reference electrode

To convert the potential from Hg/HgO to RHE, we have carried out LSV in hydrogen saturated 0.1 M KOH solution at a scan rate of 1 mV/s with Pt as the working electrode, Pt as the counter electrode

and Hg/HgO as the reference electrode. The potential at which the current crosses the zero line is taken as the correction factor.

$$\text{So, } E(\text{RHE}) = E(\text{Hg/HgO}) + 0.870$$

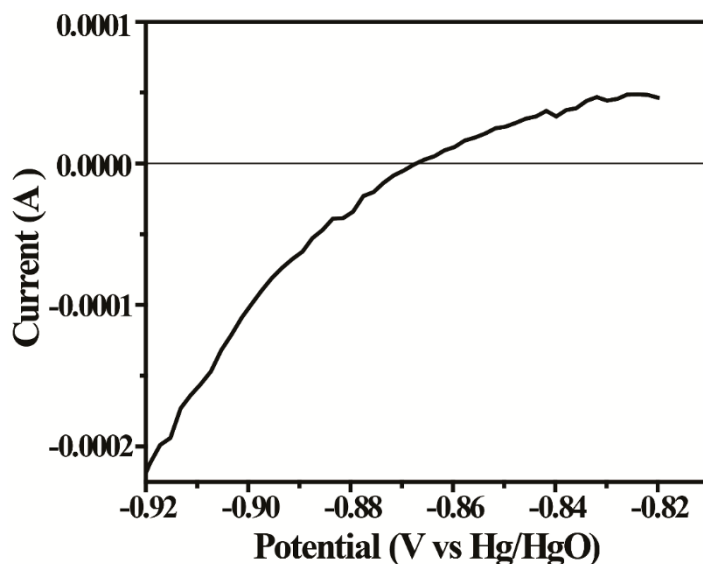

**Fig. S10.** Calibration curve for reference electrode.

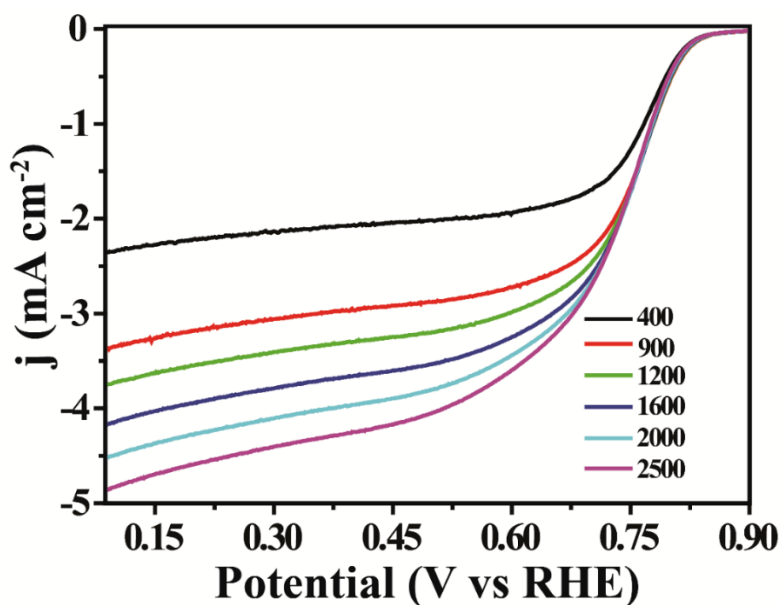

**Fig. S11.** Linear sweep voltammograms (LSVs) of  $\text{Co(OH)}_2\text{-MoS}_2/\text{rGO}$  with different rotation rates of the working electrode in 0.1 M KOH solution saturated with  $\text{O}_2$ . The potential scan rate was  $5\text{ mV s}^{-1}$  and Hg/HgO and a graphite rod were used as the reference and counter electrodes, respectively.



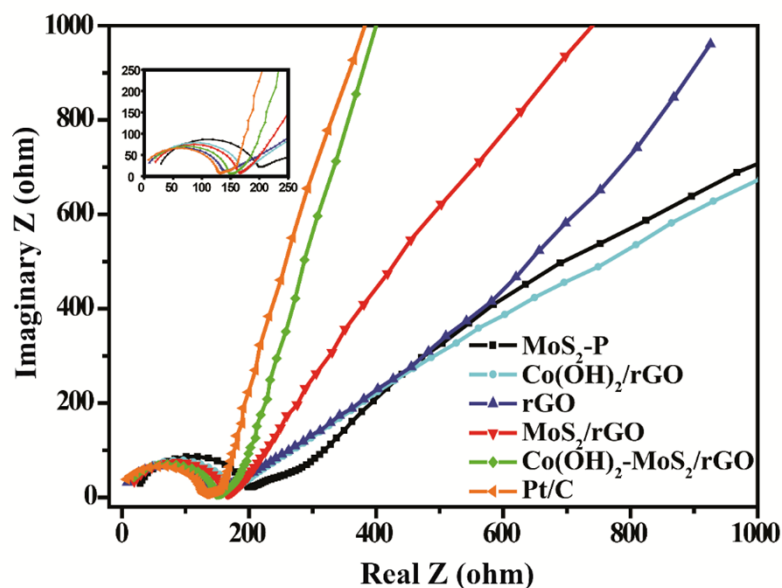

**Figure S12:** Nyquist plots of MoS<sub>2</sub>-P, Co(OH)<sub>2</sub>/rGO, rGO, MoS<sub>2</sub>/rGO, Co(OH)<sub>2</sub>-MoS<sub>2</sub>/rGO and Pt/C. Inset shows the magnified portion of the plot at the high frequency range.

The electrochemical impedance (EIS) study was carried out in the frequency range of 10<sup>6</sup> Hz to 0.1 Hz with an AC amplitude of 10 mV in the open circuit voltage condition. The charge transfer resistance ( $R_{ct}$ ) value of MoS<sub>2</sub>-P is comparatively much higher (171.23  $\Omega$ ) than that of the other samples (161.34, 153.61, 139.87 and 136.82  $\Omega$  respectively for Co(OH)<sub>2</sub>/rGO, MoS<sub>2</sub>/rGO, rGO and Co(OH)<sub>2</sub>-MoS<sub>2</sub>/rGO). This reveals the poor electrical conductivity for MoS<sub>2</sub>-P as compared to the rest of the samples. The results clearly indicate that the presence of rGO in MoS<sub>2</sub> is helping the system to decrease its  $R_{ct}$  value (153.61  $\Omega$ ). This, in other words, means that the incorporation of rGO in MoS<sub>2</sub> ultimately increases the electrical conductivity of the composite materials. Among the prepared samples, Co(OH)<sub>2</sub>-MoS<sub>2</sub>/rGO has the lowest  $R_{ct}$  value (136.82  $\Omega$ ) and this infers that the electron movement is faster in this particular composite. This ultimately reflects to the improvement in the ORR performance of Co(OH)<sub>2</sub>-MoS<sub>2</sub>/rGO.

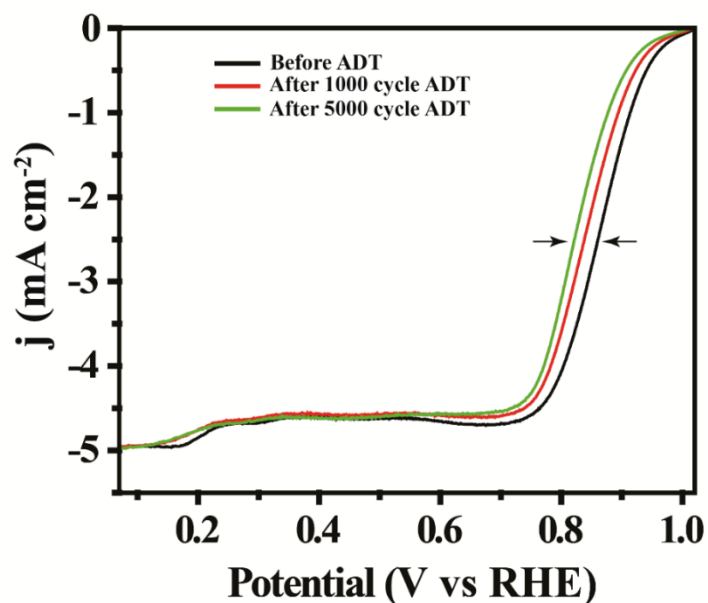

**Fig. S13.** LSVs for the durability test of 40 wt. % Pt/C in 0.1 M KOH solution saturated with O<sub>2</sub>. The recording was done by maintaining a scan rate of 5mV s<sup>-1</sup> and an electrode rotation speed of 1600 rpm.

Table S1. Electrical conductivity data of MoS<sub>2</sub>-P, MoS<sub>2</sub>/rGO and Co(OH)<sub>2</sub>-MoS<sub>2</sub>/rGO.

| Sl.No. | Sample                                     | Electrical Conductivity (S/cm) |
|--------|--------------------------------------------|--------------------------------|
| 1      | MoS <sub>2</sub> -P                        | 0.0072                         |
| 2      | MoS <sub>2</sub> /rGO                      | 0.435                          |
| 3      | Co(OH) <sub>2</sub> -MoS <sub>2</sub> /rGO | 0.609                          |

Table S2. Comparison of the ORR performance of MoS<sub>2</sub>-P, Co(OH)<sub>2</sub>/rGO, rGO, MoS<sub>2</sub>/rGO, Co(OH)<sub>2</sub>-MoS<sub>2</sub>/rGO and Pt/C.

| Sl.No. | Catalyst                                   | Onsetpotential (V) | E <sub>1/2</sub> (V) |
|--------|--------------------------------------------|--------------------|----------------------|
| 1      | MoS <sub>2</sub> -P                        | 0.708              | 0.349                |
| 2      | Co(OH) <sub>2</sub> /rGO                   | 0.817              | 0.650                |
| 3      | rGO                                        | 0.792              | 0.603                |
| 4      | MoS <sub>2</sub> /rGO                      | 0.805              | 0.646                |
| 5      | Co(OH) <sub>2</sub> -MoS <sub>2</sub> /rGO | 0.855              | 0.731                |
| 6      | Pt/C                                       | 0.963              | 0.860                |

**Table S3.** Comparison of the present study with few recent reports of MoS<sub>2</sub> for oxygen reduction reaction.

| Sl. No. | Catalyst                                   | Synthesis Method | Onset Potential (V) | Reference Electrode | Electrolyte | References |
|---------|--------------------------------------------|------------------|---------------------|---------------------|-------------|------------|
| 1       | MoS <sub>2</sub>                           | Exfoliation      | -0.28               | SCE                 | 0.1 M KOH   | 5          |
| 2       | AuNP/MoS <sub>2</sub> film                 | Drop casting     | -0.10               | SCE                 | 0.1 M KOH   | 6          |
| 3       | MoS <sub>2</sub> NDs/NGr                   | Hydrothermal     | 0.95                | RHE                 | 0.1 M KOH   | 7          |
| 4       | MoS <sub>2</sub> /NGr                      | Physical mixing  | -0.12               | SCE                 | 0.1 M KOH   | 8          |
| 5       | Co(OH) <sub>2</sub> -MoS <sub>2</sub> /rGO | Hydrothermal     | 0.855               | RHE                 | 0.1 M KOH   | This work  |

## References

- 1 C.-B. Ma, X. Qi, B. Chen, S. Bao, Z. Yin, X.-J. Wu, Z. Luo, J. Wei, H.-L. Zhang and H. Zhang, *Nanoscale*, 2014, **6**, 5624.
- 2 K. Dewangan, N. N. Sinha, P. K. Sharma, A. C. Pandey, N. Munichandraiah and N. S. Gajbhiye, *CrystEngComm*, 2011, **13**, 927.
- 3 H. Nan, Z. Wang, W. Wang, Z. Liang, Y. Lu, Q. Chen, D. He, P. Tan, F. Miao, X. Wang, J. Wang and Z. Ni, *ACS Nano*, 2014, **8**, 5738.
- 4 D. Ghosh, S. Giri and C. K. Das, *ACS Sustainable Chem. Eng.*, 2013, **1**, 1135.
- 5 T. Wang, D. Gao, J. Zhuo, Z. Zhu, P. Papakonstantinou, Y. Li and M. Li, *Chem. Eur. J.*, 2013, **19**, 11939.
- 6 T. Wang, J. Zhuo, Y. Chen, K. Du, P. Papakonstantinou, Z. Zhu, Y. Shao and M. Li, *ChemCatChem*, 2014, **6**, 1877.
- 7 C. Du, H. Huang, X. Feng, S. Wu and W. Song, *J. Mater. Chem. A*, 2015, **3**, 7616.
- 8 K. Zhao, W. Gu, L. Zhao, C. Zhang, W. Peng and Y. Xian, *Electrochim. Acta*, 2015, **169**, 142.
